# Supplementary material
Source: PubMed Central journal article supplement (PMC1182468)

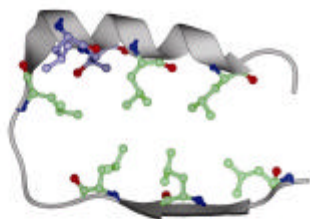

**LRR8**

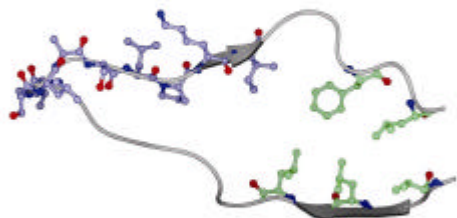

**LRR12**

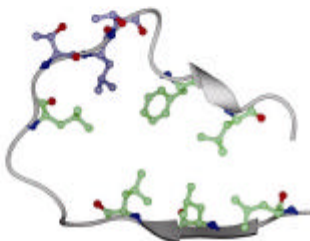

**LRR14**

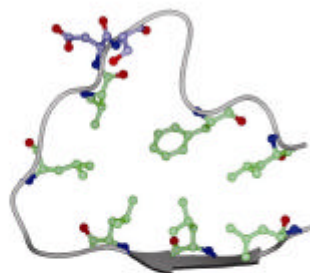

**LRR18**

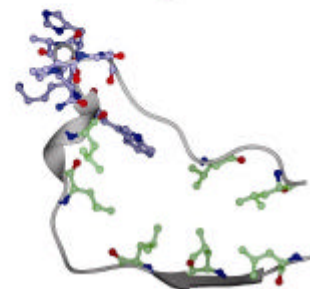

**LRR20**

Supplement: pnas_0505077102_1.pdf [file pnas_0505077102_1.pdf]

**A**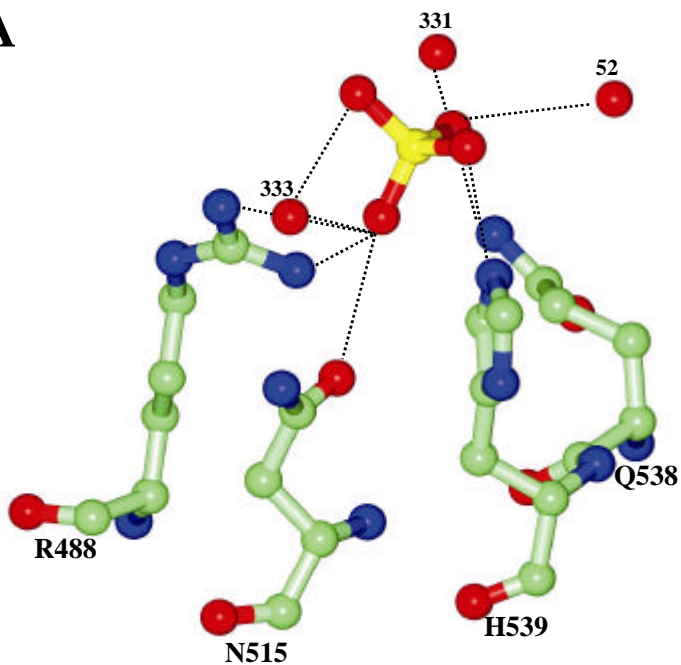**B**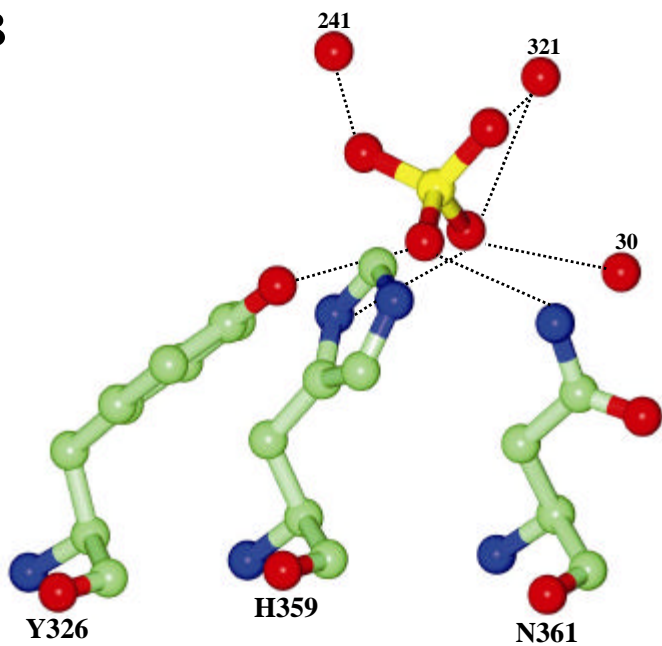

Supplement: pnas_0505077102_2.pdf [file pnas_0505077102_2.pdf]
